# Supplementary material
Source: Springer Nature journal article supplement (https://www.springermedizin.de/resource/supplementary/12885_2014_5177_MOESM3_ESM.pdf/9468490)
Supplement: MOESM3 [file 9468490]

**Supplementary Table 3.** Enriched KEGG pathways of predicted targets for the seven miRNAs (miR-9\*, miR125a-5p, miR-25, miR-125b, miR-335, miR-19a and miR-9) in cluster 2.

| KEGG pathway                                           | P value  | Number of genes | Genes                                                                                                                                                                                                                                                       |
|--------------------------------------------------------|----------|-----------------|-------------------------------------------------------------------------------------------------------------------------------------------------------------------------------------------------------------------------------------------------------------|
| Glycosaminoglycan biosynthesis - heparan sulfate       | 3.98E-07 | 5               | EXT1, GLCE, HS3ST3B1, HS6ST1, HS6ST2                                                                                                                                                                                                                        |
| Mucin type O-Glycan biosynthesis                       | 7.03E-06 | 6               | GALNT12, GALNT13, GALNT14, GALNT3, GALNTL1, GCNT1                                                                                                                                                                                                           |
| Biotin metabolism                                      | 1.38E-05 | 1               | HLCS                                                                                                                                                                                                                                                        |
| Pantothenate and CoA biosynthesis                      | 2.19E-03 | 7               | BCAT1, BCAT2, ENPP1, PANK1, PANK3, PPCS, VNN1                                                                                                                                                                                                               |
| Glioma                                                 | 2.19E-03 | 15              | CALM1, CALM2, CDK6, E2F2, IGF1, PDGFRA, PDGFRB, PIK3CA, PIK3R1, PIK3R3, PLCG1, PTEN, RB1, SHC1, SHC2                                                                                                                                                        |
| N-Glycan biosynthesis                                  | 1.40E-02 | 8               | ALG1, MAN1A1, MAN1A2, MAN1B1, MGAT4A, MGAT5, ST6GAL1, STT3B                                                                                                                                                                                                 |
| Endocytosis                                            | 1.40E-02 | 35              | ACAP2, ARAP2, ARF6, ASAP2, CAV2, CBL, CCR5, CHMP2B, CXCR4, EHD4, GIT2, ITCH, LDLRAP1, NEDD4, PARD6B, PDCD6IP, PDGFRA, PLD1, PSD3, RAB11A, RAB11FIP4, SH3GLB1, SH3KBP1, SMAD2, SMAP2, SMURF1, SMURF2, STAM, TGFB2, TRAF6, USP8, VPS37C, VPS4B, WWP1, ZFYVE16 |
| Cysteine and methionine metabolism                     | 1.57E-02 | 9               | DNMT3A, GOT1, GOT2, LDHB, MAT1A, MAT2B, MTAP, MTR, TRDMT1                                                                                                                                                                                                   |
| Lysine degradation                                     | 1.59E-02 | 10              | DLSTP, EHHADH, GLT25D2, MLL, MLL3, SETD2, SETD7, SUV39H1, SUV420H2, TMLHE                                                                                                                                                                                   |
| Arrhythmogenic right ventricular cardiomyopathy (ARVC) | 1.57E-02 | 16              | ACTN2, CACNB1, CACNB2, CACNB3, CTNNA1, DMD, ITGA2, ITGA6, ITGB1, ITGB4, JUP, LMNA, RYR2, SGCD, SLC8A1, TCF7                                                                                                                                                 |
| Axon guidance                                          | 1.73E-02 | 27              | ABL1, ABLIM1, ABLIM3, CFL2, CXCR4, EFNA1, EPHA4, EPHA7, EPHB4, GNAI1, ITGB1, NFAT5, NFATC1, NFATC2, NRP1, PAK2, RASA1, ROBO1, ROCK1, SEMA4C, SEMA4D, SEMA4F, SEMA5A, SEMA6A, SRGAP3, UNC5C, UNC5D                                                           |
| Protein processing in endoplasmic reticulum            | 2.39E-02 | 29              | AC079305.6-2, ATXN3, ATXN3L, BAK1, DERL1, DNAJA1, DNAJC3, EIF2AK2, EIF2AK3, EIF2S1, HERPUD1, HSPH1, LMAN1, MAN1A1, MAN1A2, MAN1B1, MAP2K7, MAPK10, MARCH6, SEL1L, SSR1, SSR3, STT3B, SYVN1, TRAM1, UBE2D3, UBE2G1, UBE4B, YOD1                              |
| Insulin signaling pathway                              | 4.32E-02 | 27              | ACACB, CALM1, CALM2, CBL, EIF4E, FLOT2, FOXO1A, HK2, INPP5D, MAPK10, PDPK1, PHKA1, PIK3CA, PIK3R1, PIK3R3, PPARGC1A, PPP1CB, PPP1R3A, PRKAA2, PRKAG2, PRKAR1A, RHOQ, SHC1, SHC2, SOCS1, SOCS4, TSC1                                                         |
